# Supplementary material for: Synthesis, Crystal Structure Analyses, and Antibacterial Evaluation of the Cobalt(II) Complex with Sulfadiazine-Pyrazole Prodrug
Source: MDPI journal article supplement (doi:10.3390/inorganics11100382), 2023-09-25
Supplement: s1 [file s1]

# Synthesis, Crystal Structure Analyses, and Antibacterial Evaluation of the Cobalt(II) Complex with Sulfadiazine-Pyrazole Prodrug

Mezna Saleh Altowyan <sup>1</sup>, Matti Haukka <sup>2</sup>, Mohammed Salah Ayoup <sup>3</sup>, Magda M. F. Ismail <sup>4</sup>, Nagwan G. El Menofy <sup>5</sup>, Saied M. Soliman <sup>3,\*</sup>, Assem Barakat <sup>6</sup>, Mona M. Sharaf <sup>7</sup>, Morsy A. M. Abu-Youssef <sup>3,\*</sup> and Amal Yousri <sup>3,\*</sup>

<sup>1</sup> Department of Chemistry, College of Science, Princess Nourah bint Abdulrahman University, P.O. Box 84428, Riyadh 11671, Saudi Arabia; msaltowyan@pnu.edu.sa

<sup>2</sup> Department of Chemistry, University of Jyväskylä, P.O. Box 35, FI-40014 Jyväskylä, Finland; matti.o.haukka@jyu.fi

<sup>3</sup> Department of Chemistry, Faculty of Science, Alexandria University, Ibrahimia, P.O. Box 426, Alexandria 21321, Egypt; mohamed.salah@alexu.edu.eg

<sup>4</sup> Department of Pharmaceutical Medicinal Chemistry, Faculty of Pharmacy (Girls), Al-Azhar University, Cairo 11884, Egypt; magdaismail@azhar.edu.eg

<sup>5</sup> Department of Microbiology and Immunology, Faculty of Pharmacy (Girls), Al-Azhar University, Cairo 11884, Egypt; nagwan.elmenofy@azhar.edu.eg

<sup>6</sup> Department of Chemistry, College of Science, King Saud University, P.O. Box 2455, Riyadh 11451, Saudi Arabia; ambarakat@ksu.edu.sa

<sup>7</sup> Protein Research Department, Genetic Engineering and Biotechnology Research Institute, City of Scientific Research and Technological Applications, Alexandria P.O. Box 21933, Egypt; sharafmona4@gmail.com

\* Correspondence: saied1soliman@yahoo.com (S.M.S.); morsy5@alexu.edu.eg (M.A.M.A.-Y.); amal.yousri@alexu.edu.eg (A.Y.)

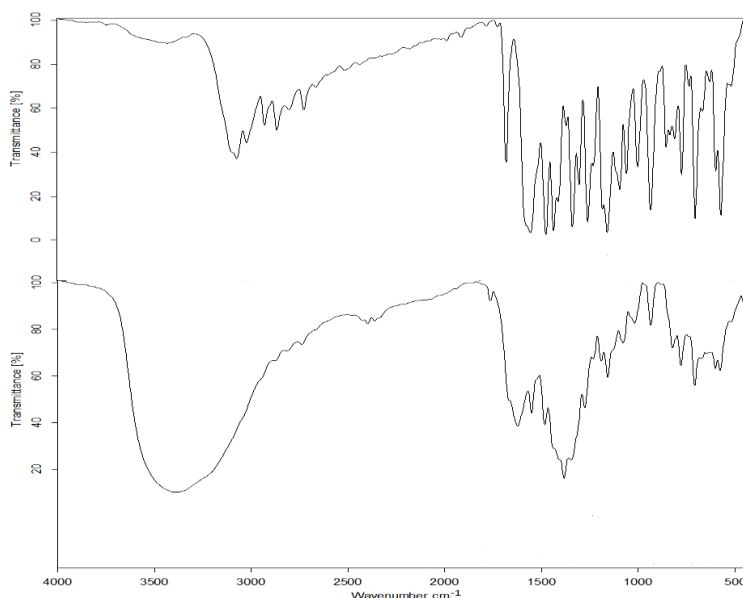

**Figure S1.** FTIR spectra of the ligand **L** (upper) and  $[\text{Co}(\text{L})(\text{H}_2\text{O})_4](\text{NO}_3)_2$  complex (lower).

### **Method S1**

The crystal of  $[\text{Co}(\text{L})(\text{H}_2\text{O})_4](\text{NO}_3)_2$  was immersed in cryo-oil, mounted in a loop, and measured at a temperature of 170 K. The X-ray diffraction data were collected using a Bruker Kappa Apex II diffractometer with Mo K-radiation. The Denzo-Scalepack [35] software package was used for cell refinement and data reduction. A multi-scan absorption correction based on equivalent reflections (SADABS [36]) was applied to the intensities before the structure solution. The structure was solved using the intrinsic phasing method with SHELXT [37] software. Structural refinement was carried out using SHELXL [38] software with the SHELXLE [39] graphical user interface. All hydrogen atoms involved in hydrogen bonding were refined to avoid any geometric restrictions. Therefore,  $\text{H}_2\text{O}$  and  $\text{NH}$  hydrogen atoms were located from the difference Fourier map and refined isotropically. Other hydrogen atoms were positioned geometrically and constrained to ride on their parent atoms, with  $\text{C-H} = 0.95\text{-}0.98 \text{ \AA}$  and  $\text{Uiso} = 1.2\text{-}1.5 \text{ Ueq}$  (parent atom).

### **Method S2**

#### ***1. Antibacterial assessment***

The two chemical substances were evaluated for antibacterial efficacy against gram-positive bacteria; *Staphylococcus aureus* (ATCC 25923) and MRSA (1) clinical isolates as well against gram-negative bacteria including; *Klebsiella pneumonia* (ATCC 700603), *Escherichia coli* (ATCC 25922), *Proteus mirabilis* and *Acinetobacter baumannii* (8). Based on the CLSI reference [42], their minimum inhibitory concentrations (MIC) are determined.

#### ***2. Determination of minimum inhibitory concentration***

Investigation of antibacterial activity of chemical compounds was performed by micro-broth dilution assay for determination of MIC. In summary, 100  $\mu$ L of Muller-Hinton broth (MHB) (Oxoid® Limited, Basingstoke, UK) were disseminated in 96 multi-well microtiter plates, followed by the addition of 100  $\mu$ L chemical compound into the first row of the microtiter plate. Then, from the first to the twelfth well, serial dilution was performed. Each well received 6  $\mu$ L of freshly prepared bacterial suspension ( $1.5 \times 10^8$  cfu/mL). For each bacterial strain, positive and negative controls were carried out. Plates were incubated for 18-24 hours at 37°C, with Amoxicillin 1000  $\mu$ g/mL serving as reference standard antibiotic. The MIC was estimated as the minimum concentration that demonstrated no detectable bacterial growth.

## References

35. Rikagu Oxford Diffraction, CrysAlisPro, 2020, Rikagu Oxford Diffraction inc., Yarnton, Oxfordshire, England.
36. Sheldrick, G. Sadabs-bruker nonius scaling and absorption correction. Bruker AXS Inc.: Madison, WI, USA 2012.
37. Sheldrick, G.M. Shelxt-integrated space-group and crystal-structure determination. *Acta Cryst.* 2015, A71, 3–8.
38. Sheldrick, G.M. Crystal structure refinement with SHELXL. *Acta Cryst.* 2015, C71, 3–8.
39. Hübschle, C.B.; Sheldrick, G.M.; Dittrich, B. A Qt Graphical User Interface for SHELXL. *J. Appl. Cryst.* 2011, 44, 1281–1284.
35. Wayne, P. Clinical and laboratory standards institute: Performance standards for antimicrobial susceptibility testing: 20th informational supplement. *CLSI document M100-S20* 2010.
42. Wayne, P. Clinical and laboratory standards institute: Performance standards for antimicrobial susceptibility testing: 20th informational supplement. *CLSI document M100-S20* 2010.
