# Supplementary material for: Synthesis, Crystal Structure Analyses, and Antibacterial Evaluation of the Cobalt(II) Complex with Sulfadiazine-Pyrazole Prodrug
Source: MDPI journal article supplement (doi:10.3390/inorganics11100382), 2023-09-25
Supplement: s1 [file s1]

Archive with 1 entries (1 files):
- inorganics-2577004-supplementary.pdf
